# Supplementary material for: Discrimination of clinically relevant Candida species by Fourier-transform infrared spectroscopy with attenuated total reflectance (FTIR-ATR)
Source: Royal Society of Chemistry journal article supplement (doi:10.1039/c6ra16769a), 2016-01-01

**Table ESI 1.** Epidemiological details of the *Candida* species isolates included in this study.

| Species                | N               | Code       | Biological product | Year | Country        |
|------------------------|-----------------|------------|--------------------|------|----------------|
| <i>C. albicans</i>     | 13              | 489        | Blood              | 2012 | Brazil         |
|                        |                 | 620        | Urine              | 2014 | Brazil         |
|                        |                 | ATCC900288 | Reference          | -    | -              |
|                        |                 | 632        | Urine              | 2014 | Brazil         |
|                        |                 | 392        | Blood              | 2011 | Brazil         |
|                        |                 | 555        | Blood              | 2011 | Brazil         |
|                        |                 | 84         | Blood              | 2007 | Brazil         |
|                        |                 | 505413     | Vaginal exsudate   | 2008 | Portugal/Braga |
|                        |                 | 568426     | Expectoration      | 2008 | Portugal/Braga |
|                        |                 | 564272     | Vaginal exudate    | 2008 | Portugal/Braga |
|                        |                 | 560        | Blood              | 2014 | Brazil         |
|                        |                 | 455        | Blood              | 2010 | Brazil         |
|                        |                 | 127        | Blood              | 2007 | Brazil         |
| <i>C. glabrata</i>     | 13              | 330        | Blood              | 2010 | Brazil         |
|                        |                 | 588        | Urine              | 2014 | Brazil         |
|                        |                 | 536        | Urine              | 2013 | Brazil         |
|                        |                 | 503        | Blood              | 2013 | Brazil         |
|                        |                 | 590        | Urine              | 2014 | Brazil         |
|                        |                 | 625        | Urine              | 2014 | Brazil         |
|                        |                 | ATCC2001   | Reference          | -    | -              |
|                        |                 | 480432     | Urine              | 2008 | Portugal/Braga |
|                        |                 | 513100     | Urine              | 2008 | Portugal/Braga |
|                        |                 | 562123     | Urine              | 2008 | Portugal/Braga |
| 585626                 | Vaginal exudate | 2008       | Portugal/Braga     |      |                |
| 585                    | Urine           | 2014       | Brazil             |      |                |
| 579                    | Urine           | 2014       | Brazil             |      |                |
| <i>C. krusei</i>       | 11              | 2.2        | Urine              | 2008 | Portugal/Braga |
|                        |                 | EPAM02     | Urine              | 2008 | Portugal/Braga |
|                        |                 | RMSA4518   | Urine              | 2008 | Portugal/Braga |
|                        |                 | EPAH04     | Urine              | 2008 | Portugal/Braga |
|                        |                 | M309       | Urine              | 2008 | Portugal/Braga |
|                        |                 | 33         | Vaginal exudate    | 2008 | Portugal/Braga |
|                        |                 | 69         | Vaginal exudate    | 2008 | Portugal/Braga |
|                        |                 | OLO111     | Catheter venoso    | 2008 | Portugal/Porto |
|                        |                 | M8         | Vaginal exudate    | 2008 |                |
|                        |                 | OL100      | Stool              | 2008 | Portugal/Porto |
| OL132                  | Sputum          | 2008       | Portugal/Porto     |      |                |
| <i>C. parapsilosis</i> | 14              | 397        | Blood              | 2011 | Brazil         |
|                        |                 | 303        | Blood              | 2010 | Brazil         |
|                        |                 | 434        | Blood              | 2012 | Brazil         |
|                        |                 | 568        | Blood              | 2014 | Brazil         |
|                        |                 | 574        | Urine              | 2014 | Brazil         |
|                        |                 | 453        | Blood              | 2010 | Brazil         |
|                        |                 | 412        | Blood              | 2011 | Brazil         |
|                        |                 | 537655     | Vaginal exudate    | 2008 | Portugal/Braga |
|                        |                 | ATCC22019  | Reference          | -    | -              |

|                          |    |           |                     |      |                |
|--------------------------|----|-----------|---------------------|------|----------------|
|                          |    | 141       | Oral                | 2008 | Portugal/Braga |
|                          |    | AM2       | Oral                | 2008 | Portugal/Braga |
|                          |    | 470       | Blood               | 2012 | Brazil         |
|                          |    | 475       | Blood               | 2012 | Brazil         |
|                          |    | 200       | Blood               | 2009 | Brazil         |
|                          |    | 497       | Blood               | 2013 | Brazil         |
|                          |    | 615       | Urine               | 2014 | Brazil         |
|                          |    | 606       | Urine               | 2014 | Brazil         |
|                          |    | 624       | Urine               | 2014 | Brazil         |
|                          |    | 630       | Urine               | 2014 | Brazil         |
|                          |    | 558       | Urine               | 2014 | Brazil         |
| <i>C. tropicalis</i>     | 12 | ATCC 750  | Reference           | -    | -              |
|                          |    | 12        | Vaginal exudate     | 2008 | Portugal/Braga |
|                          |    | 612       | Urine               | 2014 | Brazil         |
|                          |    | 75        | Vaginal exudate     | 2008 | Portugal/Braga |
|                          |    | 575343    | Urine               | 2008 | Portugal/Braga |
|                          |    | 85        | Urine               |      | Brazil         |
|                          |    | 16        | Urine               | 2008 | Brazil         |
|                          |    | 29        | Urine               | 2008 | Portugal/Braga |
| <i>C. lusitaniae</i>     | 4  | 30        | Urine               | 2008 | Portugal/Braga |
|                          |    | 37        | Urine               | 2008 | Portugal/Braga |
|                          |    | OL142     | Urine               | 2009 | Portugal/Porto |
| <i>C. famata</i>         | 2  | 63        | -                   |      | Portugal/Porto |
|                          |    | OL120     | Sputum              | 2008 | Portugal/Porto |
|                          |    | 31        |                     |      | Portugal/Porto |
| <i>C. dubliniensis</i>   | 3  | ATCC 87   | Reference           | -    | -              |
|                          |    | CBS       |                     |      | Portugal/Porto |
| <i>C. orthopsilosis</i>  | 2  | CO8       | -                   | -    | Portugal/Porto |
|                          |    | CO2       | -                   | -    | Portugal/Porto |
|                          |    | 16        | -                   | -    | Portugal/Porto |
| <i>C. metapsilosis</i>   | 4  | 17        | -                   | -    | Portugal/Porto |
|                          |    | OLO49     | Sputum              | 2007 | Portugal/Porto |
|                          |    | OLO67     | Pus                 | 2008 | Portugal/Porto |
| <i>C. bracarensis</i>    | 2  | 153MT     | Vaginal exudate     |      | Portugal/Braga |
|                          |    | CNMCL7030 | Catheter            |      | Spain          |
|                          |    | NCYC3133  | Blood               |      | United Kingdom |
| <i>C. guilliermondii</i> | 2  | OLO77     | Cerebrospinal fluid | 2008 | Portugal/Porto |
|                          |    | OLO72     | Sputum              | 2008 | Portugal/Porto |

N- number of isolates of each species; Code- laboratory internal code of the isolate

**Figure ESI 1.** Loadings 1 (—) and 2 (—) of the PLSDA regression model for discriminating between *C. albicans*, *C. glabrata*, *C. krusei*, *C. parapsilosis* and *C. tropicalis*.

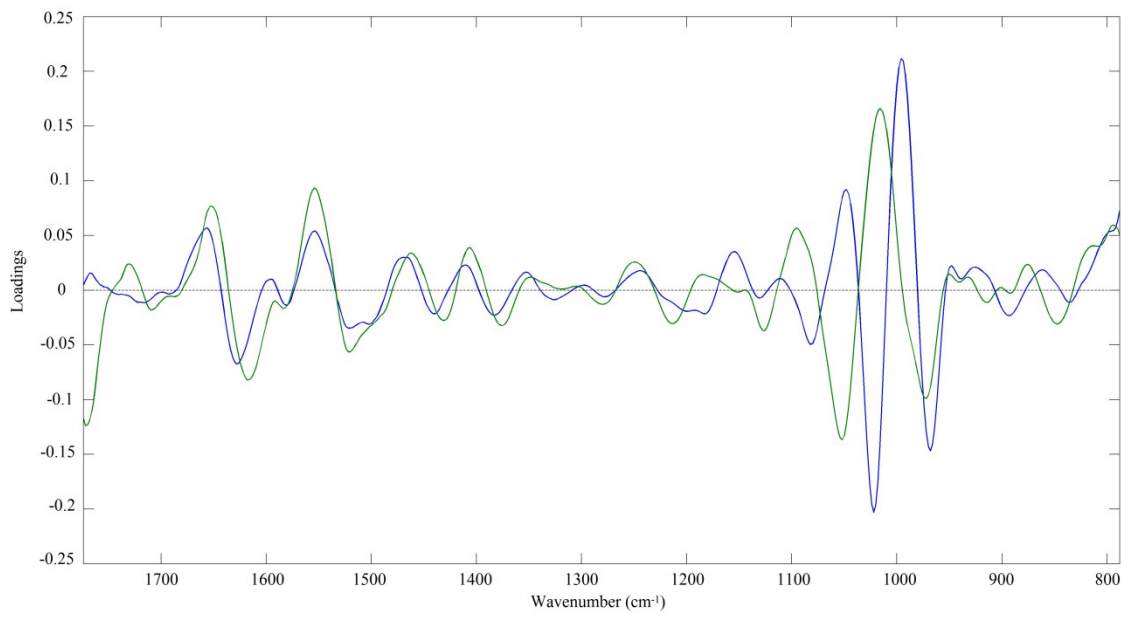

**Figure ESI 2.** Loadings 1 (—) and 2 (—) of the PCA model for discriminating between *C. parapsilosis*, *C. metapsilosis* and *C. orthopsilosis*.

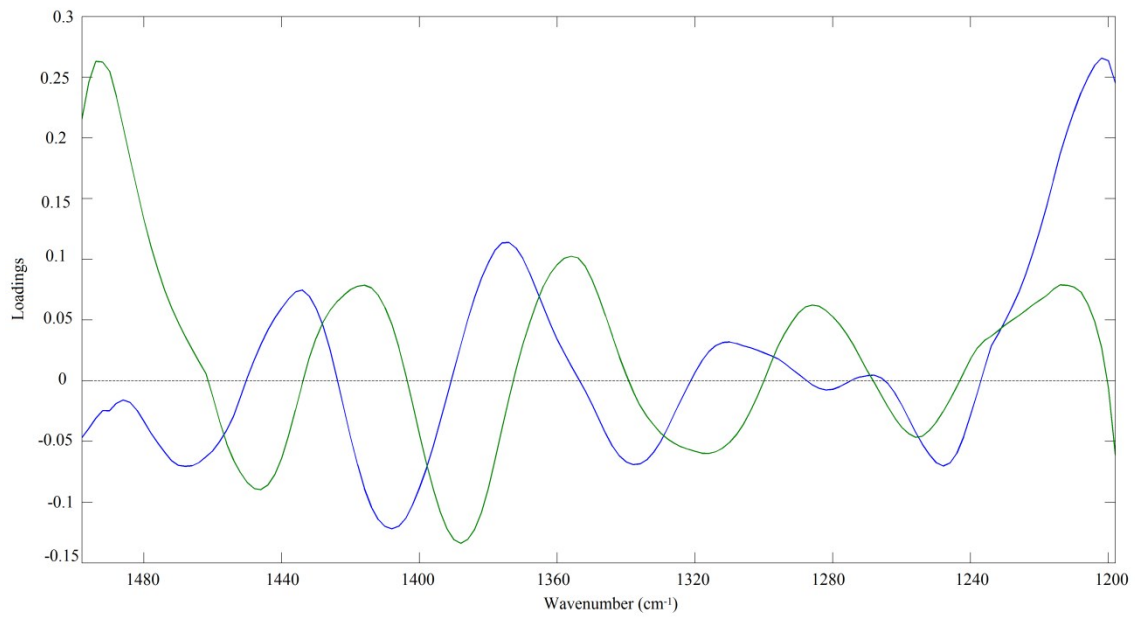

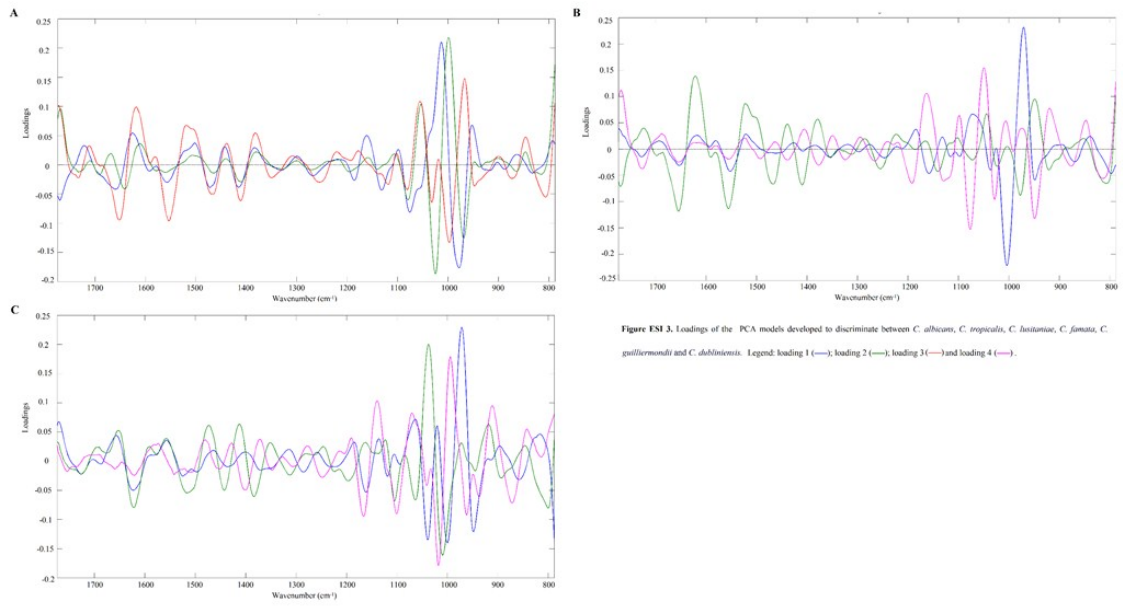

**Figure ESI 4.** Loadings 1 (—), 2 (—) and 3 (—) of the PCA model developed to discriminate between *C. glabrata* and *C. braccarensis*.

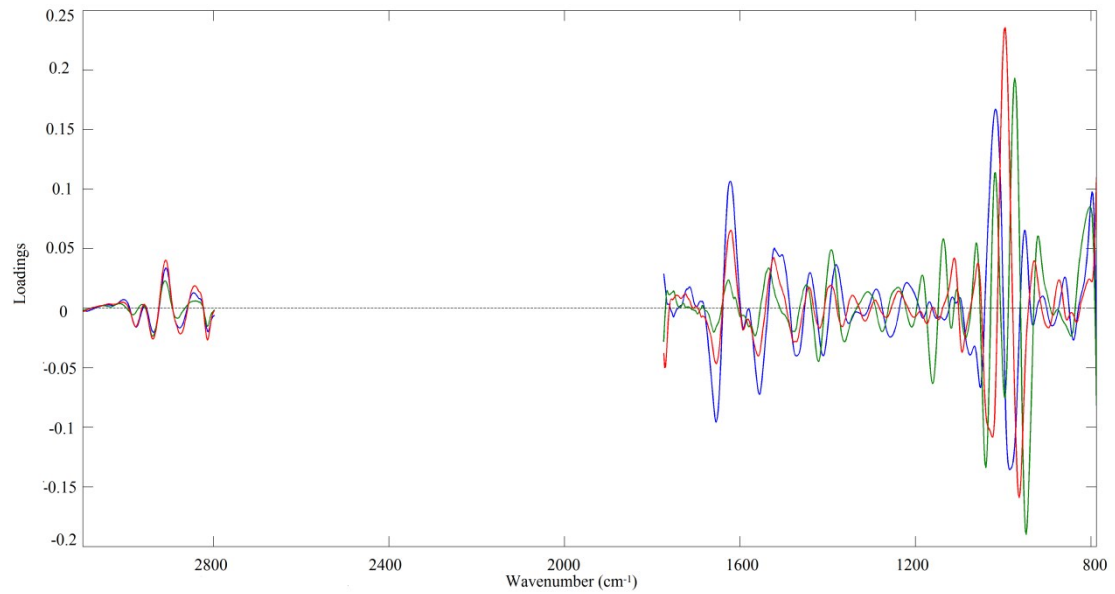

Supplement: c6ra16769a1.pdf [file c6ra16769a1.pdf]
